# Supplementary material
Source: publisher figshare collection journal article supplement (https://acs.figshare.com/ndownloader/files/25506675)
Supplement: Supplementary file 1 [file 25506675]

## Supporting Information

# **Ultra-Fast Removal of Phosphate from Eutrophic Waters using Cerium-based Metal-Organic Framework**

Mohamed H. Hassan<sup>§</sup>, Robert Stanton<sup>£</sup>, Jeremy Secora<sup>§</sup>, Dhara J. Trivedi<sup>£</sup>, and Silvana Andreescu<sup>§, \*</sup>

<sup>§</sup> Department of Chemistry and Biomolecular Science, Clarkson University, Potsdam, New York 13699, United States.

<sup>£</sup> Department of Physics, Clarkson University, Potsdam, New York 13699, United States.

\* [eandrees@clarkson.edu](mailto:eandrees@clarkson.edu)

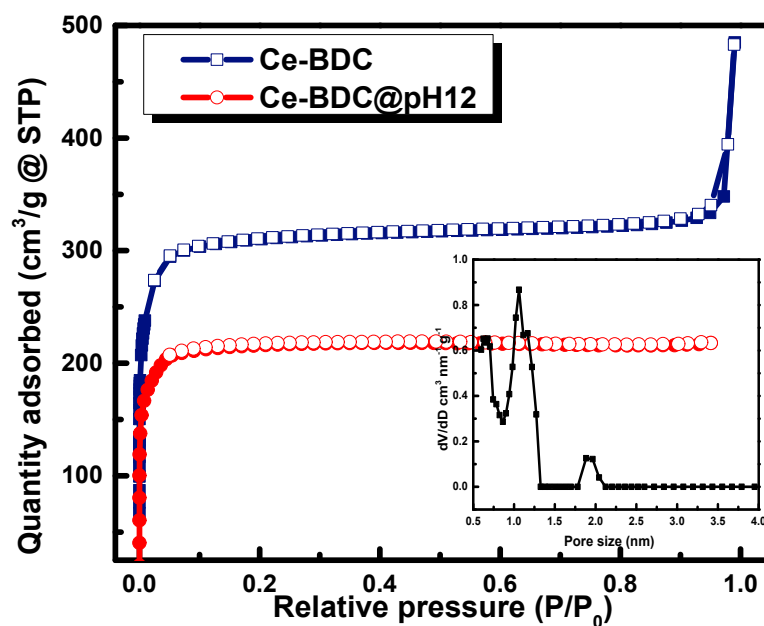

**Figure S1.** N<sub>2</sub> gas sorption isotherms measured at 77 K for Ce-BDC and Ce-BDC soaked in aqueous solution at pH 12. Insert shows the pore size distribution histograms. Filled and hollow symbols are for adsorption and desorption, respectively.

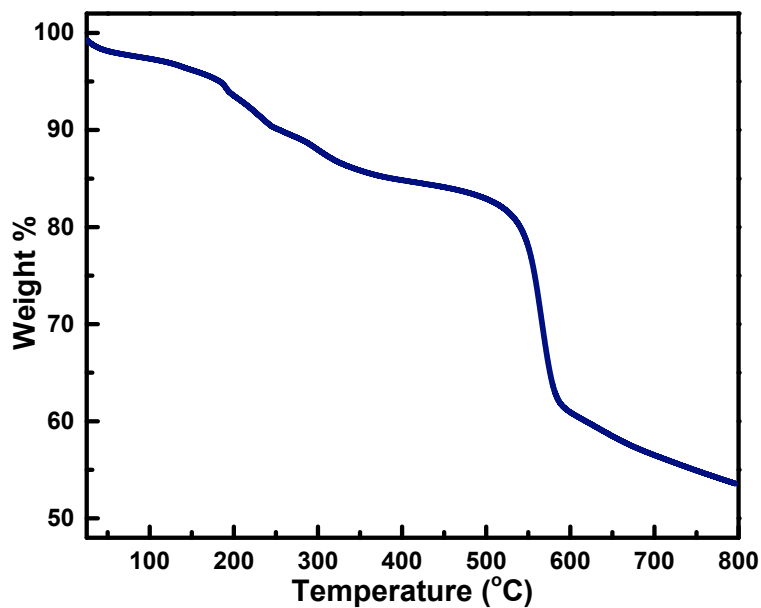

**Figure S2.** TGA curve of Ce-BDC.

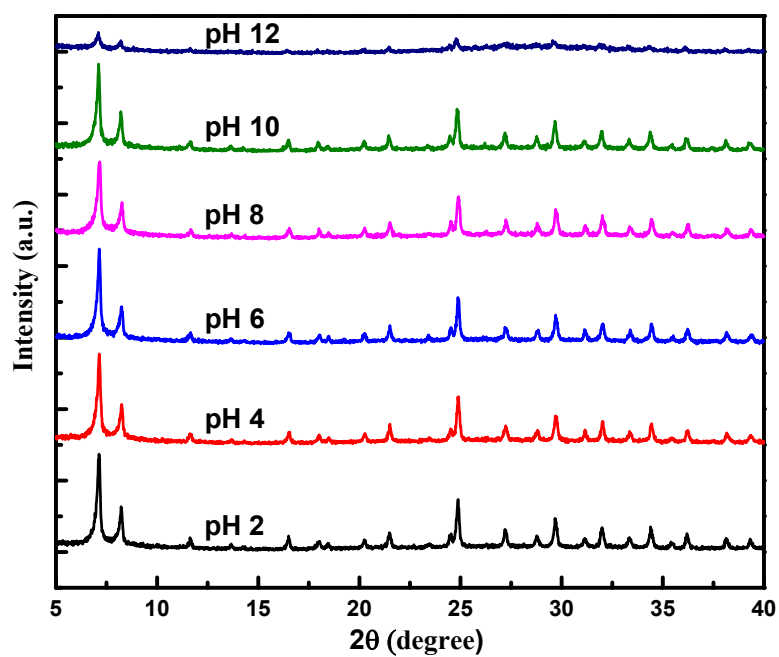

**Figure S3.** XRD patterns of Ce-BDC soaked in aqueous solutions with pH values of 2 to 12 for 2h.

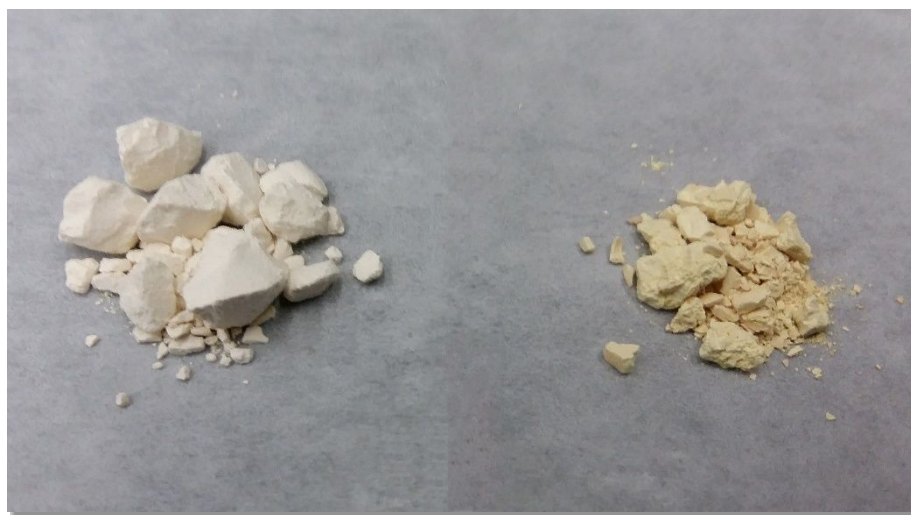

**Figure S4.** Optical images of Ce-BDC before (left) and after (right) phosphate uptake.
